# Supplementary material for: A Healthcare Service Delivery and Epidemiological Model for Investigating Resource Allocation for Health: The Thanzi La Onse Model
Source: bioRxiv or medRxiv preprint supplement (doi:10.1101/2024.01.04.24300834), 2024-01-04
Supplement: Supplementary file [file media-2.pdf]

**Table S1: The Healthcare System Interaction (HSI) events in the model.** Each row is for one HSI and shows the class of HSI it belong to, the service of which that HSI is a part (its “TREATMENT\_ID”), the facility level(s) at which it operates and the ‘Appointment Type(s)’ and ‘Bed Type(s)’ it requires.

| Module        | TREATMENT_ID                                | HSI Event Class                                   | Facility Level | Appointment Types          | Bed-Type    |
|---------------|---------------------------------------------|---------------------------------------------------|----------------|----------------------------|-------------|
| Alri          | Alri_Pneumonia_Treatment_Inpatient          | Alri_Treatment                                    | 2              | IPAdmission, InpatientDays | general_bed |
| Alri          | Alri_Pneumonia_Treatment_Inpatient          | Alri_Treatment                                    | 2              | -                          | general_bed |
| Alri          | Alri_Pneumonia_Treatment_Inpatient_Followup | Alri_Treatment                                    | 1a             | IPAdmission, InpatientDays | general_bed |
| Alri          | Alri_Pneumonia_Treatment_Inpatient_Followup | Alri_Treatment                                    | 2              | IPAdmission, InpatientDays | general_bed |
| Alri          | Alri_Pneumonia_Treatment_Outpatient         | Alri_Treatment                                    | 0              | ConWithDCSA                | -           |
| Alri          | Alri_Pneumonia_Treatment_Outpatient         | Alri_Treatment                                    | 0              | -                          | -           |
| Alri          | Alri_Pneumonia_Treatment_Outpatient         | Alri_Treatment                                    | 1a             | Under5OPD                  | -           |
| Alri          | Alri_Pneumonia_Treatment_Outpatient         | Alri_Treatment                                    | 1a             | -                          | -           |
| Alri          | Alri_Pneumonia_Treatment_Outpatient         | Alri_Treatment                                    | 2              | Under5OPD                  | -           |
| Alri          | Alri_Pneumonia_Treatment_Outpatient         | Alri_Treatment                                    | 2              | -                          | -           |
| BladderCancer | BladderCancer_Investigation                 | BladderCancer_Investigation_Following_Blood_Urine | 2              | Over5OPD                   | -           |
| BladderCancer | BladderCancer_Investigation                 | BladderCancer_Investigation_Following_Blood_Urine | 2              | -                          | -           |
| BladderCancer | BladderCancer_Investigation                 | BladderCancer_Investigation_Following_pelvic_pain | 2              | Over5OPD                   | -           |
| BladderCancer | BladderCancer_Investigation                 | BladderCancer_Investigation_Following_pelvic_pain | 2              | -                          | -           |
| BladderCancer | BladderCancer_PalliativeCare                | BladderCancer_PalliativeCare                      | 2              | IPAdmission, InpatientDays | general_bed |
| BladderCancer | BladderCancer_Treatment                     | BladderCancer_PostTreatmentCheck                  | 3              | Over5OPD                   | -           |

|                                   |                                                                     |                                                                   |    |                                       |             |
|-----------------------------------|---------------------------------------------------------------------|-------------------------------------------------------------------|----|---------------------------------------|-------------|
| <b>BladderCancer</b>              | BladderCancer_Treatment                                             | BladderCancer_StartTreatment                                      | 3  | IPAdmission, InpatientDays, MajorSurg | general_bed |
| <b>BreastCancer</b>               | BreastCancer_Investigation                                          | BreastCancer_Investigation_Following_breast_lump_discernible      | 3  | -                                     | -           |
| <b>BreastCancer</b>               | BreastCancer_Investigation                                          | BreastCancer_Investigation_Following_breast_lump_discernible      | 3  | Mammography, Over5OPD                 | -           |
| <b>BreastCancer</b>               | BreastCancer_PalliativeCare                                         | BreastCancer_PalliativeCare                                       | 2  | IPAdmission, InpatientDays            | general_bed |
| <b>BreastCancer</b>               | BreastCancer_Treatment                                              | BreastCancer_PostTreatmentCheck                                   | 3  | Over5OPD                              | -           |
| <b>BreastCancer</b>               | BreastCancer_Treatment                                              | BreastCancer_StartTreatment                                       | 3  | IPAdmission, InpatientDays, MajorSurg | general_bed |
| <b>CardioMetabolicDisorders</b>   | CardioMetabolicDisorders_Investigation                              | CardioMetabolicDisorders_Investigations                           | 2  | Over5OPD                              | -           |
| <b>CardioMetabolicDisorders</b>   | CardioMetabolicDisorders_Prevention_CommunityTestingForHypertension | CardioMetabolicDisorders_CommunityTestingForHypertension          | 1a | Over5OPD                              | -           |
| <b>CardioMetabolicDisorders</b>   | CardioMetabolicDisorders_Prevention_WeightLoss                      | CardioMetabolicDisorders_StartWeightLossAndMedication             | 2  | Over5OPD                              | -           |
| <b>CardioMetabolicDisorders</b>   | CardioMetabolicDisorders_Prevention_WeightLoss                      | CardioMetabolicDisorders_StartWeightLossAndMedication             | 2  | -                                     | -           |
| <b>CardioMetabolicDisorders</b>   | CardioMetabolicDisorders_Treatment                                  | CardioMetabolicDisorders_Refill_Medication                        | 2  | Over5OPD                              | -           |
| <b>CardioMetabolicDisorders</b>   | CardioMetabolicDisorders_Treatment                                  | CardioMetabolicDisorders_Refill_Medication                        | 2  | -                                     | -           |
| <b>CardioMetabolicDisorders</b>   | CardioMetabolicDisorders_Treatment                                  | CardioMetabolicDisorders_SeeksEmergencyCareAndGetsTreatment       | 2  | AccidentsandEmerg                     | -           |
| <b>CareOfWomenDuringPregnancy</b> | AntenatalCare_FollowUp                                              | CareOfWomenDuringPregnancy_AntenatalOutpatientManagementOfAnaemia | 1a | Over5OPD                              | -           |

|                                   |                          |                                                                               |    |                            |               |
|-----------------------------------|--------------------------|-------------------------------------------------------------------------------|----|----------------------------|---------------|
| <b>CareOfWomenDuringPregnancy</b> | AntenatalCare_FollowUp   | CareOfWomenDuringPregnancy_AntenatalOutpatientManagementOfGestationalDiabetes | 1a | Over5OPD                   | -             |
| <b>CareOfWomenDuringPregnancy</b> | AntenatalCare_Inpatient  | CareOfWomenDuringPregnancy_AntenatalWardInpatientCare                         | 2  | IPAdmission, InpatientDays | maternity_bed |
| <b>CareOfWomenDuringPregnancy</b> | AntenatalCare_Inpatient  | CareOfWomenDuringPregnancy_PresentsForInductionOfLabour                       | 1a | IPAdmission, InpatientDays | maternity_bed |
| <b>CareOfWomenDuringPregnancy</b> | AntenatalCare_Outpatient | CareOfWomenDuringPregnancy_FifthAntenatalCareContact                          | 1a | ANCSubsequent              | -             |
| <b>CareOfWomenDuringPregnancy</b> | AntenatalCare_Outpatient | CareOfWomenDuringPregnancy_FifthAntenatalCareContact                          | 1a | -                          | -             |
| <b>CareOfWomenDuringPregnancy</b> | AntenatalCare_Outpatient | CareOfWomenDuringPregnancy_FirstAntenatalCareContact                          | 1a | AntenatalFirst             | -             |
| <b>CareOfWomenDuringPregnancy</b> | AntenatalCare_Outpatient | CareOfWomenDuringPregnancy_FirstAntenatalCareContact                          | 1a | -                          | -             |
| <b>CareOfWomenDuringPregnancy</b> | AntenatalCare_Outpatient | CareOfWomenDuringPregnancy_FourthAntenatalCareContact                         | 1a | ANCSubsequent              | -             |
| <b>CareOfWomenDuringPregnancy</b> | AntenatalCare_Outpatient | CareOfWomenDuringPregnancy_FourthAntenatalCareContact                         | 1a | -                          | -             |
| <b>CareOfWomenDuringPregnancy</b> | AntenatalCare_Outpatient | CareOfWomenDuringPregnancy_SecondAntenatalCareContact                         | 1a | ANCSubsequent              | -             |
| <b>CareOfWomenDuringPregnancy</b> | AntenatalCare_Outpatient | CareOfWomenDuringPregnancy_SecondAntenatalCareContact                         | 1a | -                          | -             |
| <b>CareOfWomenDuringPregnancy</b> | AntenatalCare_Outpatient | CareOfWomenDuringPregnancy_SeventhAntenatalCareContact                        | 1a | -                          | -             |
| <b>CareOfWomenDuringPregnancy</b> | AntenatalCare_Outpatient | CareOfWomenDuringPregnancy_SeventhAntenatalCareContact                        | 1a | ANCSubsequent              | -             |
| <b>CareOfWomenDuringPregnancy</b> | AntenatalCare_Outpatient | CareOfWomenDuringPregnancy_SixthAntenatalCareContact                          | 1a | ANCSubsequent              | -             |

|                                   |                                    |                                                         |    |                                       |               |
|-----------------------------------|------------------------------------|---------------------------------------------------------|----|---------------------------------------|---------------|
| <b>CareOfWomenDuringPregnancy</b> | AntenatalCare_Outpatient           | CareOfWomenDuringPregnancy_SixthAntenatalCareContact    | 1a | -                                     | -             |
| <b>CareOfWomenDuringPregnancy</b> | AntenatalCare_Outpatient           | CareOfWomenDuringPregnancy_ThirdAntenatalCareContact    | 1a | ANCSubsequent                         | -             |
| <b>CareOfWomenDuringPregnancy</b> | AntenatalCare_Outpatient           | CareOfWomenDuringPregnancy_ThirdAntenatalCareContact    | 1a | -                                     | -             |
| <b>CareOfWomenDuringPregnancy</b> | AntenatalCare_PostAbortion         | CareOfWomenDuringPregnancy_PostAbortionCaseManagement   | 2  | IPAdmission, InpatientDays            | maternity_bed |
| <b>CareOfWomenDuringPregnancy</b> | AntenatalCare_PostEctopicPregnancy | CareOfWomenDuringPregnancy_TreatmentForEctopicPregnancy | 2  | IPAdmission, InpatientDays, MajorSurg | maternity_bed |
| <b>Contraception</b>              | Contraception_Routine              | Contraception_FamilyPlanningAppt                        | 1a | FamPlan                               | -             |
| <b>Contraception</b>              | Contraception_Routine              | Contraception_FamilyPlanningAppt                        | 1a | -                                     | -             |
| <b>Contraception</b>              | Contraception_Routine              | Contraception_FamilyPlanningAppt                        | 1a | PharmDispensing                       | -             |
| <b>Contraception</b>              | Contraception_Routine              | Contraception_FamilyPlanningAppt                        | 2  | FamPlan                               | -             |
| <b>Contraception</b>              | Contraception_Routine              | Contraception_FamilyPlanningAppt                        | 2  | -                                     | -             |
| <b>Contraception</b>              | Contraception_Routine              | Contraception_FamilyPlanningAppt                        | 2  | MinorSurg                             | -             |
| <b>Depression</b>                 | Depression_TalkingTherapy          | Depression_TalkingTherapy                               | 2  | MentOPD                               | -             |
| <b>Depression</b>                 | Depression_Treatment               | Depression_Refill_Antidepressant                        | 1a | -                                     | -             |
| <b>Depression</b>                 | Depression_Treatment               | Depression_Refill_Antidepressant                        | 1a | Over50PD                              | -             |
| <b>Depression</b>                 | Depression_Treatment               | Depression_Start_Antidepressant                         | 2  | MentOPD                               | -             |
| <b>Depression</b>                 | Depression_Treatment               | Depression_Start_Antidepressant                         | 2  | -                                     | -             |
| <b>Diarrhoea</b>                  | Diarrhoea_Treatment_Inpatient      | Diarrhoea_Treatment_Inpatient                           | 1a | IPAdmission, InpatientDays            | general_bed   |
| <b>Diarrhoea</b>                  | Diarrhoea_Treatment_Outpatient     | Diarrhoea_Treatment_Outpatient                          | 1a | Under50PD                             | -             |

|                               |                                       |                               |    |                   |   |
|-------------------------------|---------------------------------------|-------------------------------|----|-------------------|---|
| <b>Epi</b>                    | Epi_Adolescent_Hpv                    | HpvVaccine                    | 1a | EPI               | - |
| <b>Epi</b>                    | Epi_Adolescent_Hpv                    | HpvVaccine                    | 2  | EPI               | - |
| <b>Epi</b>                    | Epi_Childhood_Bcg                     | BcgVaccine                    | 1a | EPI               | - |
| <b>Epi</b>                    | Epi_Childhood_Bcg                     | BcgVaccine                    | 2  | EPI               | - |
| <b>Epi</b>                    | Epi_Childhood_DtpHibHep               | DtpHibHepVaccine              | 1a | EPI               | - |
| <b>Epi</b>                    | Epi_Childhood_DtpHibHep               | DtpHibHepVaccine              | 2  | EPI               | - |
| <b>Epi</b>                    | Epi_Childhood_MeaslesRubella          | MeaslesRubellaVaccine         | 1a | EPI               | - |
| <b>Epi</b>                    | Epi_Childhood_MeaslesRubella          | MeaslesRubellaVaccine         | 2  | EPI               | - |
| <b>Epi</b>                    | Epi_Childhood_Opv                     | opv                           | 1a | EPI               | - |
| <b>Epi</b>                    | Epi_Childhood_Opv                     | opv                           | 2  | EPI               | - |
| <b>Epi</b>                    | Epi_Childhood_Pneumo                  | PneumoVaccine                 | 1a | EPI               | - |
| <b>Epi</b>                    | Epi_Childhood_Pneumo                  | PneumoVaccine                 | 2  | EPI               | - |
| <b>Epi</b>                    | Epi_Childhood_Rota                    | RotaVaccine                   | 1a | EPI               | - |
| <b>Epi</b>                    | Epi_Childhood_Rota                    | RotaVaccine                   | 2  | EPI               | - |
| <b>Epi</b>                    | Epi_Pregnancy_Td                      | TdVaccine                     | 1a | -                 | - |
| <b>Epilepsy</b>               | Epilepsy_Treatment_Followup           | Epilepsy_Follow_Up            | 2  | Over5OPD          | - |
| <b>Epilepsy</b>               | Epilepsy_Treatment_Followup           | Epilepsy_Follow_Up            | 2  | -                 | - |
| <b>Epilepsy</b>               | Epilepsy_Treatment_Followup           | Epilepsy_Follow_Up            | 2  | PharmDispensing   | - |
| <b>Epilepsy</b>               | Epilepsy_Treatment_Start              | Epilepsy_Start_Anti_Epileptic | 2  | Over5OPD          | - |
| <b>HealthSeekingBehaviour</b> | FirstAttendance_Emergency             | GenericEmergencyFirstAppt     | 2  | -                 | - |
| <b>HealthSeekingBehaviour</b> | FirstAttendance_NonEmergency          | GenericNonEmergencyFirstAppt  | 0  | -                 | - |
| <b>HealthSeekingBehaviour</b> | FirstAttendance_NonEmergency          | GenericNonEmergencyFirstAppt  | 1a | -                 | - |
| <b>HealthSeekingBehaviour</b> | FirstAttendance_NonEmergency          | GenericNonEmergencyFirstAppt  | 2  | -                 | - |
| <b>HealthSeekingBehaviour</b> | FirstAttendance_SpuriousEmergencyCare | EmergencyCare_SpuriousSymptom | 1a | AccidentsandEmerg | - |

|                     |                             |                                                    |    |                                            |               |
|---------------------|-----------------------------|----------------------------------------------------|----|--------------------------------------------|---------------|
| <b>HealthSystem</b> | Inpatient_Care              | Inpatient_Care                                     | 3  | InpatientDays                              | -             |
| <b>Hiv</b>          | Hiv_Prevention_Circumcision | Hiv_Circ                                           | 1a | MaleCirc                                   | -             |
| <b>Hiv</b>          | Hiv_Prevention_Infant       | Hiv_StartInfantProphylaxis                         | 1a | -                                          | -             |
| <b>Hiv</b>          | Hiv_Prevention_Infant       | Hiv_StartInfantProphylaxis                         | 1a | Peds, VCTNegative                          | -             |
| <b>Hiv</b>          | Hiv_Prevention_Prep         | Hiv_StartOrContinueOnPrep                          | 1a | PharmDispensing, VCTNegative               | -             |
| <b>Hiv</b>          | Hiv_Test                    | Hiv_TestAndRefer                                   | 1a | VCTPositive                                | -             |
| <b>Hiv</b>          | Hiv_Test                    | Hiv_TestAndRefer                                   | 1a | VCTNegative                                | -             |
| <b>Hiv</b>          | Hiv_Test                    | Hiv_TestAndRefer                                   | 1a | -                                          | -             |
| <b>Hiv</b>          | Hiv_Treatment               | Hiv_StartOrContinueTreatment                       | 1a | NewAdult                                   | -             |
| <b>Hiv</b>          | Hiv_Treatment               | Hiv_StartOrContinueTreatment                       | 1a | Peds                                       | -             |
| <b>Hiv</b>          | Hiv_Treatment               | Hiv_StartOrContinueTreatment                       | 1a | EstNonCom                                  | -             |
| <b>Labour</b>       | DeliveryCare_Basic          | Labour_ReceivesSkilledBirthAttendanceDuringLabour  | 1a | IPAdmission, InpatientDays, NormalDelivery | maternity_bed |
| <b>Labour</b>       | DeliveryCare_Basic          | Labour_ReceivesSkilledBirthAttendanceDuringLabour  | 1a | CompDelivery                               | maternity_bed |
| <b>Labour</b>       | DeliveryCare_Basic          | Labour_ReceivesSkilledBirthAttendanceDuringLabour  | 2  | IPAdmission, InpatientDays, NormalDelivery | maternity_bed |
| <b>Labour</b>       | DeliveryCare_Basic          | Labour_ReceivesSkilledBirthAttendanceDuringLabour  | 2  | CompDelivery                               | maternity_bed |
| <b>Labour</b>       | DeliveryCare_Comprehensive  | Labour_ReceivesComprehensiveEmergencyObstetricCare | 2  | Csection                                   | -             |
| <b>Labour</b>       | DeliveryCare_Comprehensive  | Labour_ReceivesComprehensiveEmergencyObstetricCare | 2  | InpatientDays                              | -             |
| <b>Labour</b>       | DeliveryCare_Comprehensive  | Labour_ReceivesComprehensiveEmergencyObstetricCare | 2  | MajorSurg                                  | -             |
| <b>Labour</b>       | FirstAttendance_Emergency   | GenericEmergencyFirstAppt                          | 2  | -                                          | -             |

|                        |                                  |                                           |    |                                       |               |
|------------------------|----------------------------------|-------------------------------------------|----|---------------------------------------|---------------|
| <b>Labour</b>          | PostnatalCare_Maternal           | Labour_ReceivesPostnatalCheck             | 1a | Over5OPD                              | -             |
| <b>Labour</b>          | PostnatalCare_Maternal           | Labour_ReceivesPostnatalCheck             | 2  | Over5OPD                              | -             |
| <b>Labour</b>          | PostnatalCare_Maternal_Inpatient | Labour_PostnatalWardInpatientCare         | 2  | IPAdmission, InpatientDays            | maternity_bed |
| <b>Malaria</b>         | Malaria_Prevention_Iptp          | MalariaPTp                                | 1a | Over5OPD                              | -             |
| <b>Malaria</b>         | Malaria_Test                     | Malaria_rdt                               | 1a | Over5OPD                              | -             |
| <b>Malaria</b>         | Malaria_Test                     | Malaria_rdt                               | 1a | Under5OPD                             | -             |
| <b>Malaria</b>         | Malaria_Test                     | Malaria_rdt                               | 1a | -                                     | -             |
| <b>Malaria</b>         | Malaria_Test                     | Malaria_rdt                               | 2  | Over5OPD                              | -             |
| <b>Malaria</b>         | Malaria_Test                     | Malaria_rdt                               | 2  | Under5OPD                             | -             |
| <b>Malaria</b>         | Malaria_Test                     | Malaria_rdt                               | 2  | -                                     | -             |
| <b>Malaria</b>         | Malaria_Test                     | Malaria_rdt_community                     | 0  | ConWithDCSA                           | -             |
| <b>Malaria</b>         | Malaria_Test                     | Malaria_rdt_community                     | 0  | -                                     | -             |
| <b>Malaria</b>         | Malaria_Treatment                | Malaria_Treatment                         | 1a | Under5OPD                             | -             |
| <b>Malaria</b>         | Malaria_Treatment                | Malaria_Treatment                         | 1a | Over5OPD                              | -             |
| <b>Malaria</b>         | Malaria_Treatment_Complicated    | Malaria_Treatment_Complicated             | 2  | IPAdmission, InpatientDays, Under5OPD | general_bed   |
| <b>Malaria</b>         | Malaria_Treatment_Complicated    | Malaria_Treatment_Complicated             | 2  | IPAdmission, InpatientDays, Over5OPD  | general_bed   |
| <b>Measles</b>         | Measles_Treatment                | Measles_Treatment                         | 1a | Over5OPD                              | -             |
| <b>Measles</b>         | Measles_Treatment                | Measles_Treatment                         | 1a | Under5OPD                             | -             |
| <b>NewbornOutcomes</b> | PostnatalCare_Neonatal           | NewbornOutcomes_ReceivesPostnatalCheck    | 1a | Under5OPD                             | -             |
| <b>NewbornOutcomes</b> | PostnatalCare_Neonatal           | NewbornOutcomes_ReceivesPostnatalCheck    | 2  | Under5OPD                             | -             |
| <b>NewbornOutcomes</b> | PostnatalCare_Neonatal_Inpatient | NewbornOutcomes_NeonatalWardInpatientCare | 2  | IPAdmission, InpatientDays            | general_bed   |

|                            |                                            |                                                                           |   |                                       |             |
|----------------------------|--------------------------------------------|---------------------------------------------------------------------------|---|---------------------------------------|-------------|
| <b>OesophagealCancer</b>   | OesophagealCancer_Investigation            | OesophagealCancer_Investigation_Following_Dysphagia                       | 2 | Over5OPD                              | -           |
| <b>OesophagealCancer</b>   | OesophagealCancer_Investigation            | OesophagealCancer_Investigation_Following_Dysphagia                       | 2 | -                                     | -           |
| <b>OesophagealCancer</b>   | OesophagealCancer_PalliativeCare           | OesophagealCancer_PalliativeCare                                          | 2 | IPAdmission, InpatientDays            | general_bed |
| <b>OesophagealCancer</b>   | OesophagealCancer_Treatment                | OesophagealCancer_PostTreatmentCheck                                      | 3 | Over5OPD                              | -           |
| <b>OesophagealCancer</b>   | OesophagealCancer_Treatment                | OesophagealCancer_StartTreatment                                          | 3 | IPAdmission, InpatientDays, MajorSurg | general_bed |
| <b>OtherAdultCancer</b>    | OtherAdultCancer_Investigation             | OtherAdultCancer_Investigation_Following_early_other_adult_cancer_symptom | 2 | Over5OPD                              | -           |
| <b>OtherAdultCancer</b>    | OtherAdultCancer_Investigation             | OtherAdultCancer_Investigation_Following_early_other_adult_cancer_symptom | 2 | -                                     | -           |
| <b>OtherAdultCancer</b>    | OtherAdultCancer_PalliativeCare            | OtherAdultCancer_PalliativeCare                                           | 2 | IPAdmission, InpatientDays            | general_bed |
| <b>OtherAdultCancer</b>    | OtherAdultCancer_Treatment                 | OtherAdultCancer_PostTreatmentCheck                                       | 3 | Over5OPD                              | -           |
| <b>OtherAdultCancer</b>    | OtherAdultCancer_Treatment                 | OtherAdultCancer_StartTreatment                                           | 3 | IPAdmission, InpatientDays, MajorSurg | general_bed |
| <b>PostnatalSupervisor</b> | PostnatalCare_TreatmentForObstetricFistula | PostnatalSupervisor_TreatmentForObstetricFistula                          | 2 | IPAdmission, InpatientDays, MajorSurg | general_bed |
| <b>PregnancySupervisor</b> | FirstAttendance_Emergency                  | GenericEmergencyFirstAppt                                                 | 2 | -                                     | -           |
| <b>ProstateCancer</b>      | ProstateCancer_Investigation               | ProstateCancer_Investigation_Following_Pelvic_Pain                        | 2 | -                                     | -           |
| <b>ProstateCancer</b>      | ProstateCancer_Investigation               | ProstateCancer_Investigation_Following_Pelvic_Pain                        | 2 | Over5OPD                              | -           |
| <b>ProstateCancer</b>      | ProstateCancer_Investigation               | ProstateCancer_Investigation_Following_Urinary_Symptoms                   | 2 | -                                     | -           |



|                       |                               |                                                         |   |                                               |             |
|-----------------------|-------------------------------|---------------------------------------------------------|---|-----------------------------------------------|-------------|
| <b>ProstateCancer</b> | ProstateCancer_Investigation  | ProstateCancer_Investigation_Following_Urinary_Symptoms | 2 | Over5OPD                                      | -           |
| <b>ProstateCancer</b> | ProstateCancer_Investigation  | ProstateCancer_Investigation_Following_psa_positive     | 2 | Over5OPD                                      | -           |
| <b>ProstateCancer</b> | ProstateCancer_Investigation  | ProstateCancer_Investigation_Following_psa_positive     | 2 | -                                             | -           |
| <b>ProstateCancer</b> | ProstateCancer_PalliativeCare | ProstateCancer_PalliativeCare                           | 2 | IPAdmission, InpatientDays                    | general_bed |
| <b>ProstateCancer</b> | ProstateCancer_Treatment      | ProstateCancer_PostTreatmentCheck                       | 3 | Over5OPD                                      | -           |
| <b>ProstateCancer</b> | ProstateCancer_Treatment      | ProstateCancer_StartTreatment                           | 3 | IPAdmission, InpatientDays, MajorSurg         | general_bed |
| <b>RTI</b>            | Rti_AcutePainManagement       | RTI_Acute_Pain_Management                               | 2 | Over5OPD                                      | -           |
| <b>RTI</b>            | Rti_AcutePainManagement       | RTI_Acute_Pain_Management                               | 2 | -                                             | -           |
| <b>RTI</b>            | Rti_AcutePainManagement       | RTI_Acute_Pain_Management                               | 2 | Under5OPD                                     | -           |
| <b>RTI</b>            | Rti_BurnManagement            | RTI_Burn_Management                                     | 2 | IPAdmission, InpatientDays, MinorSurg         | general_bed |
| <b>RTI</b>            | Rti_FractureCast              | RTI_Fracture_Cast                                       | 2 | AccidentsandEmerg                             | -           |
| <b>RTI</b>            | Rti_FractureCast              | RTI_Fracture_Cast                                       | 2 | -                                             | -           |
| <b>RTI</b>            | Rti_Imaging                   | RTI_Imaging_Event                                       | 2 | DiagRadio                                     | -           |
| <b>RTI</b>            | Rti_Imaging                   | RTI_Imaging_Event                                       | 3 | DiagRadio, Tomography                         | -           |
| <b>RTI</b>            | Rti_MajorSurgeries            | RTI_Major_Surgeries                                     | 2 | -                                             | -           |
| <b>RTI</b>            | Rti_MajorSurgeries            | RTI_Major_Surgeries                                     | 2 | MajorSurg                                     | -           |
| <b>RTI</b>            | Rti_MedicalIntervention       | RTI_Medical_Intervention                                | 2 | AccidentsandEmerg, IPAdmission, InpatientDays | general_bed |
| <b>RTI</b>            | Rti_MedicalIntervention       | RTI_Medical_Intervention                                | 2 | AccidentsandEmerg, IPAdmission, InpatientDays | -           |
| <b>RTI</b>            | Rti_MinorSurgeries            | RTI_Minor_Surgeries                                     | 2 | -                                             | -           |

|                 |                           |                                     |    |                                  |   |
|-----------------|---------------------------|-------------------------------------|----|----------------------------------|---|
| <b>RTI</b>      | Rti_MinorSurgeries        | RTI_Minor_Surgeries                 | 2  | MinorSurg                        | - |
| <b>RTI</b>      | Rti_OpenFractureTreatment | RTI_Open_Fracture_Treatment         | 2  | MinorSurg                        | - |
| <b>RTI</b>      | Rti_ShockTreatment        | RTI_Shock_Treatment                 | 2  | -                                | - |
| <b>RTI</b>      | Rti_ShockTreatment        | RTI_Shock_Treatment                 | 2  | AccidentsandEmerg                | - |
| <b>RTI</b>      | Rti_Suture                | RTI_Suture                          | 2  | -                                | - |
| <b>RTI</b>      | Rti_Suture                | RTI_Suture                          | 2  | Over5OPD                         | - |
| <b>RTI</b>      | Rti_Suture                | RTI_Suture                          | 2  | Under5OPD                        | - |
| <b>RTI</b>      | Rti_TetanusVaccine        | RTI_Tetanus_Vaccine                 | 2  | EPI                              | - |
| <b>RTI</b>      | Rti_TetanusVaccine        | RTI_Tetanus_Vaccine                 | 2  | -                                | - |
| <b>Schisto</b>  | Schisto_MDA               | Schisto_MDA                         | 1a | EPI                              | - |
| <b>Schisto</b>  | Schisto_Treatment         | Schisto_TestingFollowingSymptoms    | 1a | Over5OPD                         | - |
| <b>Schisto</b>  | Schisto_Treatment         | Schisto_TestingFollowingSymptoms    | 1a | Under5OPD                        | - |
| <b>Schisto</b>  | Schisto_Treatment         | Schisto_TreatmentFollowingDiagnosis | 1a | Under5OPD                        | - |
| <b>Schisto</b>  | Schisto_Treatment         | Schisto_TreatmentFollowingDiagnosis | 1a | Over5OPD                         | - |
| <b>Stunting</b> | Undernutrition_Feeding    | Stunting_ComplementaryFeeding       | 1a | U5Malnutr                        | - |
| <b>Tb</b>       | Tb_Prevention_Ipt         | Tb_Start_or_Continue_Ipt            | 1a | Over5OPD                         | - |
| <b>Tb</b>       | Tb_Test_FollowUp          | Tb_FollowUp                         | 1a | LabTBMicro, TBFollowUp           | - |
| <b>Tb</b>       | Tb_Test_FollowUp          | Tb_FollowUp                         | 1a | LabMolec, LabTBMicro, TBFollowUp | - |
| <b>Tb</b>       | Tb_Test_FollowUp          | Tb_FollowUp                         | 1a | TBFollowUp                       | - |
| <b>Tb</b>       | Tb_Test_Screening         | Tb_ScreeningAndRefer                | 1a | -                                | - |
| <b>Tb</b>       | Tb_Test_Screening         | Tb_ScreeningAndRefer                | 1a | LabTBMicro, Over5OPD             | - |

|           |                   |                      |    |                      |   |
|-----------|-------------------|----------------------|----|----------------------|---|
| <b>Tb</b> | Tb_Test_Screening | Tb_ScreeningAndRefer | 1a | Under5OPD            | - |
| <b>Tb</b> | Tb_Test_Xray      | Tb_Xray_level1b      | 2  | DiagRadio            | - |
| <b>Tb</b> | Tb_Test_Xray      | Tb_Xray_level1b      | 2  | DiagRadio, Under5OPD | - |
| <b>Tb</b> | Tb_Test_Xray      | Tb_Xray_level2       | 2  | DiagRadio, Under5OPD | - |
| <b>Tb</b> | Tb_Test_Xray      | Tb_Xray_level2       | 2  | DiagRadio            | - |
| <b>Tb</b> | Tb_Test_Xray      | Tb_Xray_level2       | 2  | -                    | - |
| <b>Tb</b> | Tb_Treatment      | Tb_StartTreatment    | 1a | TBNew                | - |
| <b>Tb</b> | Tb_Treatment      | Tb_StartTreatment    | 1a | PharmDispensing      | - |
| <b>Tb</b> | Tb_Treatment      | Tb_StartTreatment    | 1a | -                    | - |
